# Supplementary material
Source: PubMed Central journal article supplement (PMC4167356)
Supplement: NIHMS626631-supplement.pdf [file NIHMS626631-supplement.pdf]

## Supplementary Table A. Experimental Stimuli

### Addition (correct)

$1 + 4 = 5$

$1 + 7 = 8$

$1 + 8 = 9$

$2 + 3 = 5$

$2 + 4 = 6$

$3 + 6 = 9$

$4 + 4 = 8$

$6 + 1 = 7$

$7 + 1 = 8$

$7 + 2 = 9$

### Addition (incorrect)

$1 + 4 = 6$

$2 + 1 = 4$

$2 + 2 = 3$

$2 + 4 = 5$

$2 + 6 = 7$

$4 + 2 = 5$

$4 + 3 = 6$

$4 + 4 = 9$

$5 + 1 = 7$

$7 + 1 = 9$

### Subtraction (correct)

$3 - 2 = 1$

$6 - 4 = 2$

$6 - 5 = 1$

$7 - 5 = 2$

$7 - 6 = 1$

$8 - 3 = 5$

$8 - 4 = 4$

$8 - 7 = 1$

$9 - 4 = 5$

$9 - 5 = 4$

### Subtraction (incorrect)

$3 - 1 = 1$

$5 - 3 = 3$

$5 - 1 = 3$

$6 - 2 = 5$

$7 - 1 = 5$

$7 - 5 = 3$

$8 - 1 = 6$

$8 - 2 = 7$

$9 - 1 = 7$

$9 - 2 = 8$
